# Supplementary material for: Targeted delivery of miR-99b reprograms tumor-associated macrophage phenotype leading to tumor regression
Source: PubMed Central journal article supplement (PMC7511616; doi:10.1136/jitc-2019-000517), 2020-09-18
Supplement: jitc-2019-000517supp001.pdf [file jitc-2019-000517supp001.pdf]

## Additional file 1

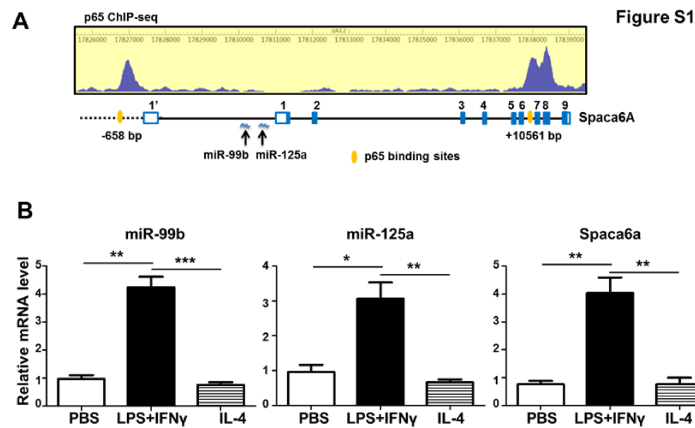

**Figure S1. miR-99b and miR-125a simultaneous transcription under LPS + IFN $\gamma$  stimulation.** A. Schematic diagram of *Spaca6A* with miR-99b/miR-125a cluster and two binding sites of p65 (in yellow). B. miR-99b, miR-125a and *Spaca6A* were transcribed in BMDMs after LPS + IFN $\gamma$  stimulation. Data are shown as mean  $\pm$  S.E.M. \*,  $P < 0.05$ ; \*\*,  $P < 0.01$ ; \*\*\*,  $P < 0.001$  by unpaired student t-test.

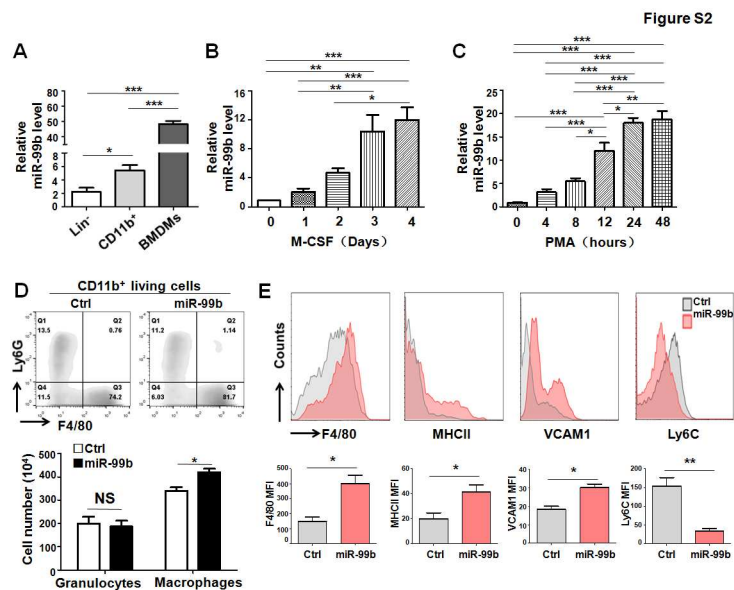

**Figure S2. miR-99b was involved in myeloid cell differentiation.** A. lineage<sup>-</sup>(Lin<sup>-</sup>) bone marrow (BM) and CD11b<sup>+</sup> monocytes were sorted by MACS. Meanwhile, monocytes were cultured in the presence of M-CSF for 7 days to obtain BM-derived macrophages (BMDMs). The expression of miR-99b in different cells was detected by qRT-PCR (n = 3). B. The expression of miR-99b during monocytes differentiation into macrophages was detected by qRT-PCR (n=3). C. THP1 monocytes were induced to differentiate into macrophages with PMA treatment, and the expression of miR-99b was detected at different time points by qRT-PCR (n=3). D. BM transfected with miR-99b mimics or control oligonucleotides (Ctrl) were cultured with GM-CSF, and the number of granulocytes (CD11b<sup>+</sup>Ly6G<sup>+</sup>F4/80<sup>-</sup>) and macrophages (CD11b<sup>+</sup>Ly6G<sup>-</sup>F4/80<sup>+</sup>) were determined by FACS (n=3). E. CD11b<sup>+</sup> monocytes transfected with miR-99b mimics or control oligonucleotides (Ctrl) were induced to differentiate into macrophages in the presence of M-CSF for 4 days. The mean fluorescence intensity (MFI) of macrophage maturation-related molecules, such as MHCII, VCAM1 and Ly6C, was analysed and compared by FACS (n=3). Data are shown as mean ± S.E.M. \*, P < 0.05; \*\*, P < 0.01; \*\*\*, P < 0.001 by unpaired student t-test.

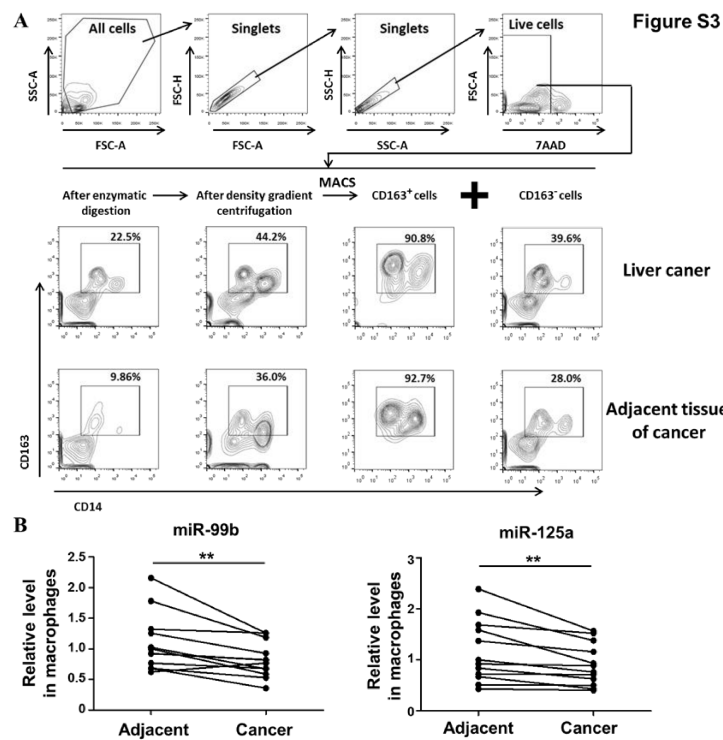

**Figure S3. Expression of miR-99b and miR-125a in TAMs sorted from tumour and adjacent tissues in patients with liver cancer.** A. The CD14<sup>+</sup>CD163<sup>+</sup> TAMs were sorted by MACS following with enzymatic digestion and density gradient centrifugation as previously described [26]. The purity of TAMs was confirmed by FACS. B. The expression of miR-99b or miR-125a in sorted TAMs as shown in (A) were determined by qRT-PCR with U6 as internal control (n=12). Data are shown as mean  $\pm$  S.E.M. \*, P < 0.05; \*\*, P < 0.01 by paired student t-test.

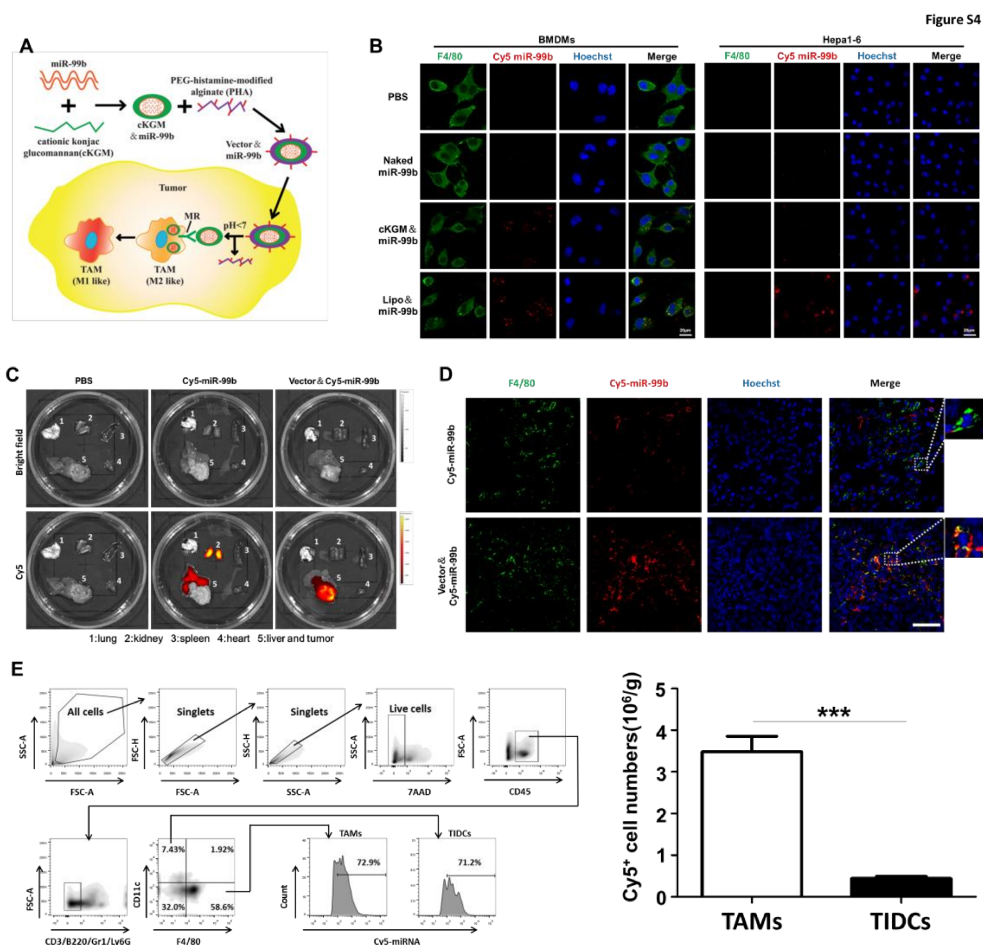

**Figure S4. Distribution of miRNA in hepatic carcinoma tissue, TAMs and TIDCs after drug delivery.** A. Schematic diagram of TAM-targeted miRNAs (eg. miR-99b) delivery system was shown. B. Cy5-labelled miR-99b was transfected into cultured BMDMs or Hepa1-6 cells. Then, the location of Cy5-miR-99b was observed and photographed by confocal microscopy. Cell nuclei were stained with Hoechst. C. The distribution of miR-99b in different organs of tumour-bearing mice were observed by IVIS Lumina system at 6 h after PBS, naked Cy5-miR-99b and vector & Cy5-miR-99b administration via mouse tail vein. D. Tumour sections of tumour-bearing mice were obtained from (C) and stained with FITC-F4/80 antibody for further observation under confocal microscopy. E. The Cy5<sup>+</sup> cells in TAM and TIDC cell population were detected by FACS and the cell number was calculated and compared (n=3). Data are shown as mean  $\pm$  S.E.M. \*, P < 0.05; \*\*, P < 0.01; \*\*\*, P < 0.001 by unpaired student

t-test.

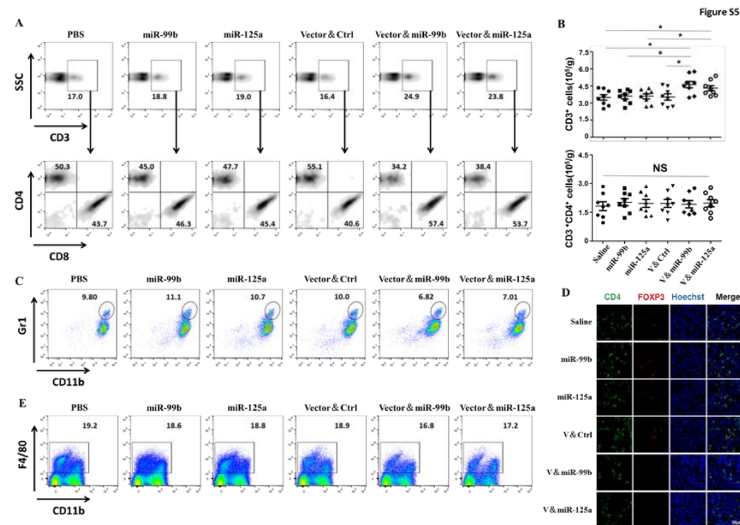

**Figure S5. The immune cell phenotype in HCC-bearing mice after different drug treatment.** A and B. The cell phenotype of CD3<sup>+</sup>CD4<sup>+</sup> and CD3<sup>+</sup>CD8<sup>+</sup> T cells was analysed by FACS (A) and the cell number was quantitatively compared (B) (n=8). C. Gr1<sup>+</sup>CD11b<sup>+</sup> MDSCs were analysed by FACS. D. The hepatic tumour sections were stained with CD4 and FOXP3 and observed by confocal microscopy. E. F4/80<sup>+</sup>CD11b<sup>+</sup> TAMs were analysed by FACS. Data are shown as mean ± S.E.M. \*, P < 0.05 by one-way ANOVA with Tukey's multiple comparison tests.

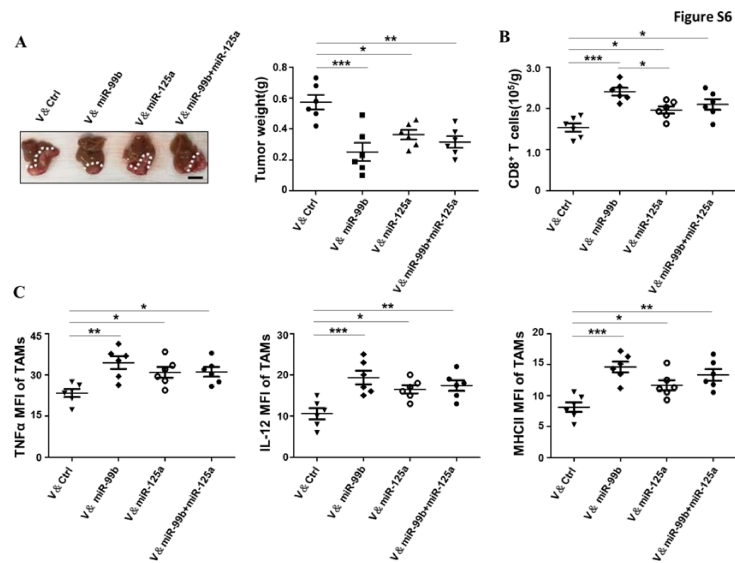

**Figure S6. Anti-tumour effect of TAM-targeted delivery miR-99b and/or miR125a in HCC mouse model.** A. tumours were isolated from HCC-bearing mice at day 29 after different drug treatments and photographed and weighed (n=6). B. The cell number of CD8<sup>+</sup> T cells in tumours was analysed and compared by FACS (n=6). C. The MFI of TNF $\alpha$ <sup>+</sup>, IL-12<sup>+</sup> and MHCII<sup>+</sup> TAMs in HCC-bearing mice was measured by FACS (n=6). Data are shown as mean  $\pm$  S.E.M. \*, P < 0.05; \*\*, P < 0.01; \*\*\*, P < 0.001 by one-way ANOVA with Tukey's multiple comparison tests.

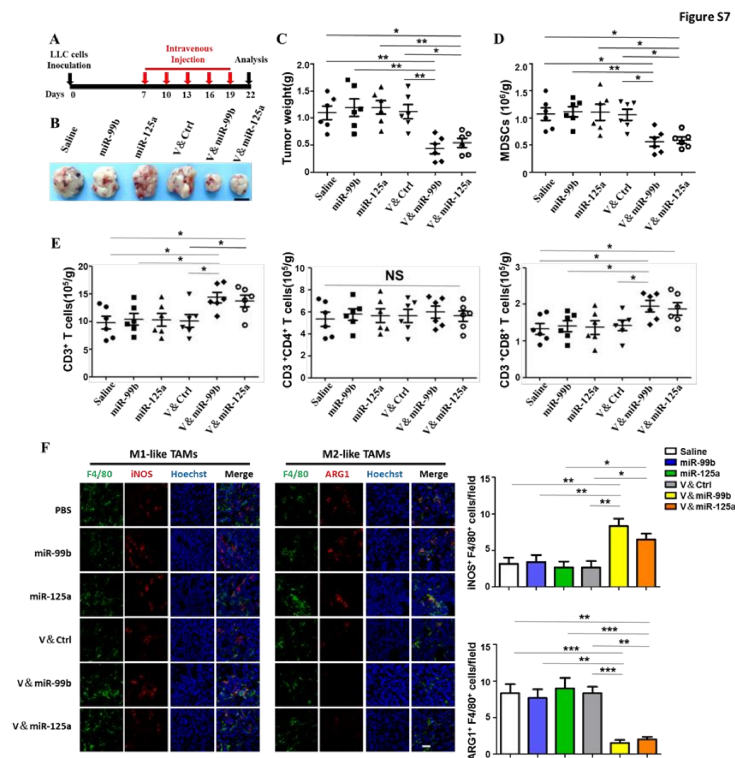

**Figure S7. Anti-tumour ability of TAM-targeted delivery of miR-99b or miR125a in subcutaneous LLC mouse model.** A. The schedule of TAM-targeted delivery of miR-99b or miR-125a into subcutaneous lung tumour was shown. B. Tumours were isolated from LLC-bearing mice at day 22 after different drug treatments, and then were photographed (n=6). C. Tumour weight was measured as shown in (B). D and E. The cell number of MDSCs (D) and CD3<sup>+</sup>, CD3<sup>+</sup>CD4<sup>+</sup> and CD3<sup>+</sup>CD8<sup>+</sup> T cells (E) in tumour was analysed by FACS and compared among each group (n=6). F. Lung tumour sections were stained with F4/80, iNOS (M1 marker) or Arg1 (M2 marker) and observed by confocal microscopy. Nuclei were stained with Hoechst. The M1- or M2- TAMs per field were quantitatively compared (n=6). Data are shown as mean  $\pm$  S.E.M. \*, P < 0.05; \*\*, P < 0.01; \*\*\*, P < 0.001 by one-way ANOVA with Tukey's multiple comparison tests.

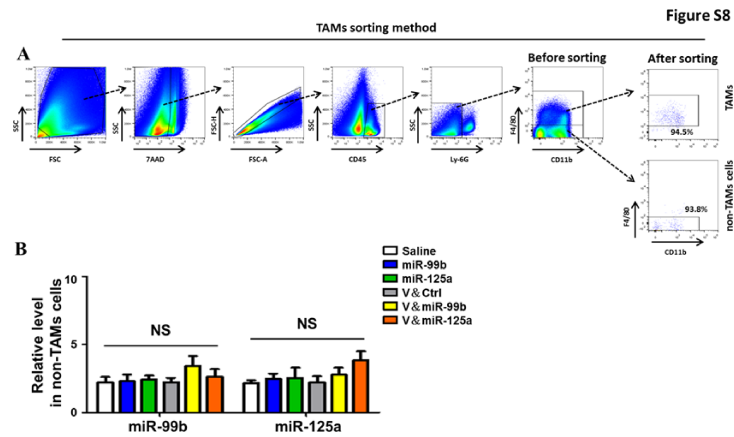

**Figure S8. Sorting strategy of TAMs from murine liver tumour.** A. The gating strategy of TAMs ( $7AAD^-CD45^+Ly6G^-CD11b^{+/lo}F4/80^+$ ) from HHC-bearing mice before sorting. The cell purity was analysed after sorting. B. Non-TAM cells ( $7AAD^-CD45^+Ly6G^-F4/80^-$ ) were sorted as shown in (A), and the expression of miR-99b or miR-125a were determined by qRT-PCR with U6 as internal control ( $n=4$ ). Data are shown as mean  $\pm$  S.E.M. One-way ANOVA with Tukey's multiple comparison tests was performed.



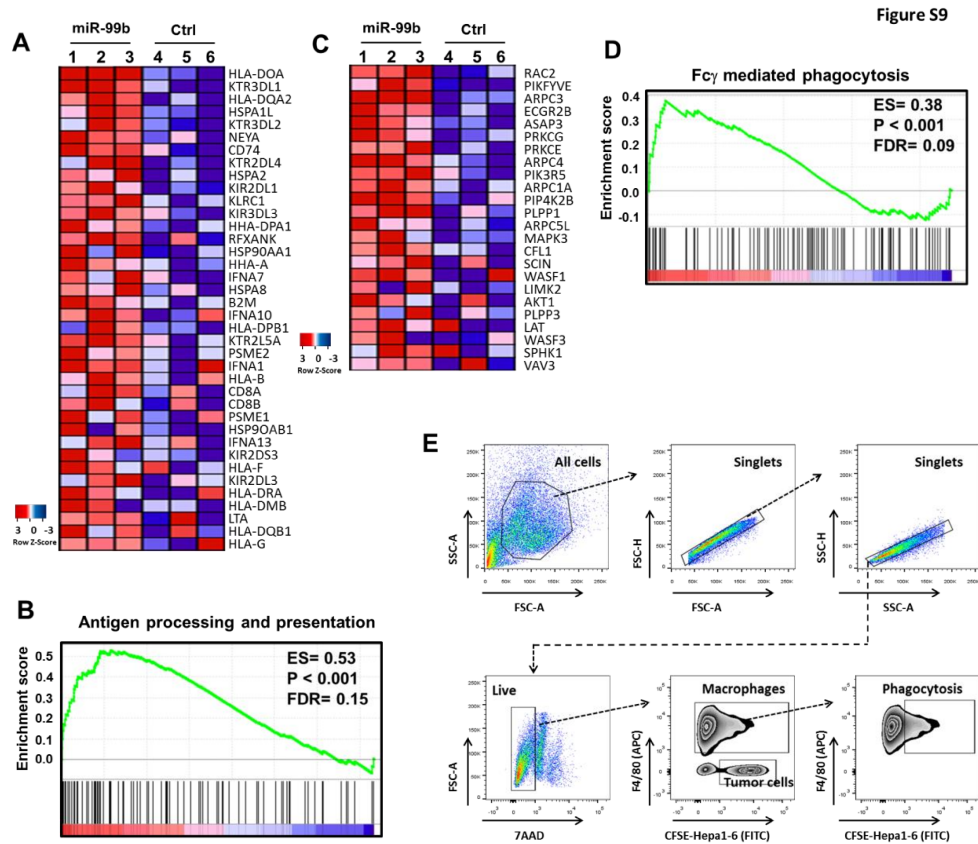

**Figure S9. Natural killer (NK) cells transfected with miR-99b exhibited the enhanced phagocytosis, antigen processing and presentation by GSEA.** A and B. RNA-sequencing data of human NK cells transfected with miR-99b or control were download and analysed (GSE69555) [12]. The significant genes with the role of antigen processing and presentation (A) and relevant GSEA (B) were shown. C and D. The significant genes with the role of Fc $\gamma$ -mediated phagocytosis (C) and relevant GSEA (D) were shown. E. The gating strategy of phagocytosis assay was displayed.

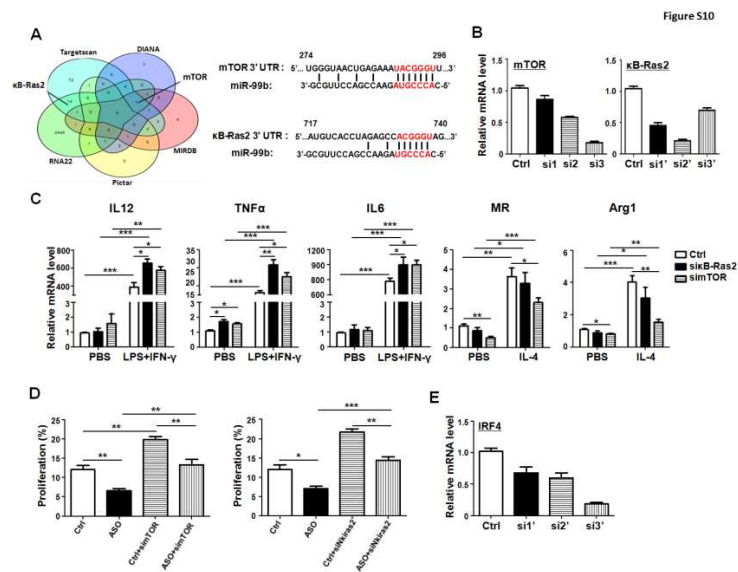

**Figure S10. Knockdown of mTOR and  $\kappa$ B-Ras2 in macrophages promoted M1 and suppressed M2 polarisation.** A. The miR-99b target genes were predicted by five different databases and displayed with Venn diagram (left panel). The recognized sequence of the 3'-UTR of mTOR (nucleotides 289 ~ 295) and  $\kappa$ B-Ras2 (nucleotides 733 ~ 738) was aligned with the seed sequence of miR-99b (right panel). B. The efficiency of knockdown mTOR (left) and  $\kappa$ B-Ras2 (Right) expression in BMDM via siRNA was determined by qRT-PCR (n=3). C. BMDMs transfected with simTOR, si $\kappa$ B-Ras2, or control siRNA were stimulated with PBS, LPS + IFN $\gamma$  or IL-4. After 24 h, the mRNA level of indicated genes was determined by qRT-PCR (n = 3). D. BMDMs transfected with miR-99b ASO or control (Ctrl) as well as simTOR or si $\kappa$ B-Ras2 were irradiated, and then co-cultured with CFSE-labelled allogeneic T cells for 24 h. The proliferation of T cells was determined by FACS (n=4). E. The efficiency of knockdown IRF4 expression in BMDM via siRNA was determined by qRT-PCR (n=3). Data are shown as mean  $\pm$  S.E.M. \*, P < 0.05; \*\*, P < 0.01; \*\*\*, P < 0.001 by unpaired student's t-test (B-D) or one-way ANOVA with Tukey's multiple comparison tests (E).

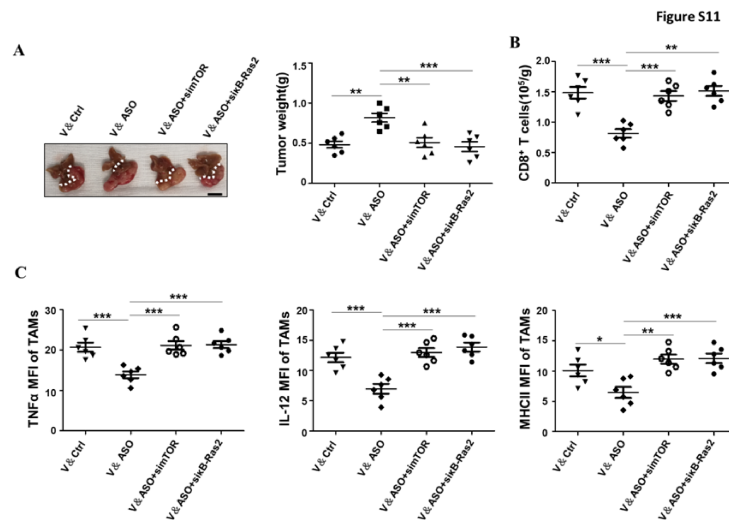

**Figure S11. TAM-targeted delivery of simTOR or siκB-Ras2 inhibited miR-99b antagomir-triggered tumour growth.** A. Tumours were isolated from HCC-bearing mice at day 29 after different drug treatments, and then were photographed and weighed (n=6). B. The CD8<sup>+</sup> T cell number in tumours was analysed and compared by FACS (n=6). C. The MFI of TNFα, IL-12 and MHCII expression in TAMs of HCC-bearing mice was analysed by FACS and compared (n=6). Data are shown as mean ± S.E.M. \*, P < 0.05; \*\*, P < 0.01; \*\*\*, P < 0.001 by one-way ANOVA with Tukey's multiple comparison tests.

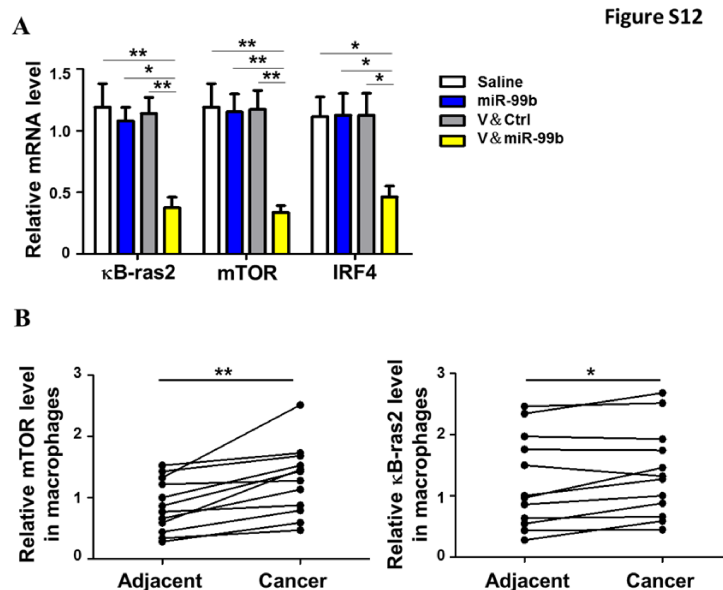

**Figure S12. miR-99b/mTOR and/or  $\kappa$ B-ras2 axis regulated TAM phenotype both in murine HCC model and liver cancer patients.** A. The expression of mTOR,  $\kappa$ B-ras2, and IRF4 in TAMs sorted from HCC-bearing mice (related with Figure 1) was measured by qRT-PCR (n=4). B. The expression of mTOR and  $\kappa$ B-ras2 in TAMs sorted from cancer and adjacent tissue of liver cancer patients (Figure S3) was detected and compared by qRT-PCR (n=12). Data are shown as mean  $\pm$  S.E.M. \*, P < 0.05; \*\*, P < 0.01 by one-way ANOVA with Tukey's multiple comparison tests (A) or paired student's t-test (B).
