# Supplementary material for: Targeted delivery of miR-99b reprograms tumor-associated macrophage phenotype leading to tumor regression
Source: PubMed Central journal article supplement (PMC7511616; doi:10.1136/jitc-2019-000517), 2020-09-18
Supplement: jitc-2019-000517supp002.pdf [file jitc-2019-000517supp002.pdf]

---

**Additional file 2****Table S1. Clinical data of 12 HCC patients involved in this study**

| <b>No.</b> | <b>AJCCstage (T stage)</b> | <b>Age</b> | <b>Sex</b> |
|------------|----------------------------|------------|------------|
| 1          | T2                         | 62         | M          |
| 2          | T2                         | 72         | M          |
| 3          | T3                         | 69         | M          |
| 4          | T1                         | 62         | M          |
| 5          | T2                         | 60         | M          |
| 6          | T3                         | 39         | M          |
| 7          | T2                         | 53         | M          |
| 8          | T1                         | 52         | F          |
| 9          | T1                         | 54         | M          |
| 10         | T1                         | 58         | M          |
| 11         | T2                         | 68         | F          |
| 12         | T1                         | 56         | M          |

**Table S2. Antibodies and related reagents used in this study**

| <b>Name</b>                            | <b>Supplier</b>          | <b>Catalog #</b> | <b>Titration</b> |
|----------------------------------------|--------------------------|------------------|------------------|
| APC CD11b                              | Biologend                | 101212           | 1/400            |
| Alexa 488 F4/80                        | Biologend                | 123120           | 1/100            |
| APC F4/80                              | eBioscience              | 174801           | 1/100            |
| Biotin MHC II                          | BD Pharmingen            | 553607           | 1/1000           |
| APC Ly6C                               | Biologend                | 128015           | 1/200            |
| Biotin Ly6G                            | Biologend                | 127603           | 1/1000           |
| APC CD3                                | Biologend                | 100236           | 1/200            |
| Biotin CD3                             | Biologend                | 100303           | 1/400            |
| Biotin B220                            | Biologend                | 103204           | 1/400            |
| Biotin Gr1                             | Biologend                | 108403           | 1/1000           |
| PE CD4                                 | BD Pharmingen            | 553048           | 1/200            |
| FITC CD8                               | BD Pharmingen            | 553030           | 1/50             |
| PE CD11c                               | BD Pharmingen            | 117307           | 1/100            |
| V450 CD45                              | BD Pharmingen            | 560501           | 1/800            |
| PE IL-12                               | eBioscience              | 127123           | 1/50             |
| PE NOS2                                | eBioscience              | 125920           | 1/100            |
| PE TNF-a                               | ebioscience              | 177321           | 1/50             |
| APC IL-10                              | eBioscience              | 177101           | 1/50             |
| Rab anti-F4/80                         | ebioscience              | 144801           | 1/400            |
| Biotin CD163                           | ebioscience              | 13163982         | 1/400            |
| PE CD14                                | ebioscience              | 12014941         | 1/200            |
| PE VCAM-1                              | ebioscience              | 121061           | 1/100            |
| Rab anti-MR                            | Abcam                    | AB64693          | 1/1000           |
| Rab anti-ARG1                          | Abcam                    | AB91279          | 1/400            |
| Rab anti-iNOS                          | Abcam                    | AB178945         | 1/400            |
| Rab anti-Ki67                          | Abcam                    | AB16667          | 1/200            |
| Rab anti-STAT3                         | CST                      | 9139             | 1/1000           |
| Rab anti-Phospho-STAT3                 | CST                      | 9145             | 1/1000           |
| Rab anti- $\beta$ -actin               | CST                      | 4970             | 1/2000           |
| Rab anti-mTOR                          | CST                      | 2983             | 1/1000           |
| Rab anti-I $\kappa$ B $\alpha$         | CST                      | 9242             | 1/1000           |
| Rab anti-Phospho-I $\kappa$ B $\alpha$ | CST                      | 2859             | 1/1000           |
| Rab anti- p65                          | CST                      | 8242             | 1/1000           |
| Rab anti-Lamin A/C                     | CST                      | 2032             | 1/1000           |
| Rab anti- $\kappa$ B-Ras2              | Signalway Antibody       | 24152            | 1/1000           |
| Mouse anti- $\alpha$ -Tubulin          | Santa Cruz Biotechnology | sc-5286          | 1/1000           |
| Rab anti-IRF4                          | Santa Cruz Biotechnology | sc-48338         | 1/1000           |
| PE streptavidin                        | eBioscience              | 124317           | 1/800            |
| Cy3 goat anti-rabbit IgG               | Boster Bio Tec           | BA1032           | 1/400            |

**Table S3. Primers and oligonucleotides used for PCR in this study**

| Name                     | Purpose | Sequence                            |
|--------------------------|---------|-------------------------------------|
| Pri-mir-125a/99b-F       | RT-PCR  | 5'-CTGACGCTTGGCAACCTATTCC           |
| Pri-mir-125a/99b-R       | RT-PCR  | 5'-GCTGTTGAGGTGGTGACAAAGG           |
| miR-99b-5p               | RT-PCR  | 5'-CACCCGTAGAACCGACCTTGCG           |
| miR-125a-5p              | RT-PCR  | 5'-TCCCTGAGACCCTTTAACCTGTGA         |
| IRF4-F                   | RT-PCR  | 5'-GGAATTGGTTCGAGAGGAG              |
| IRF4-R                   | RT-PCR  | 5'-GAGAGCCATAAGGTGCTG               |
| TNF- $\alpha$ -F         | RT-PCR  | 5'-CAGGAGGGAGAACAGAACTCCA           |
| TNF- $\alpha$ -R         | RT-PCR  | 5'-CCTGGTTGGCTGCTTGCTT              |
| IL-12-F                  | RT-PCR  | 5'-GGAAGCACGGCAGCAGAATA             |
| IL-12-R                  | RT-PCR  | 5'-AACTTGAGGGAGAAGTAGGAATGG         |
| IL-6-F                   | RT-PCR  | 5'-CCACTTCACAAGTCGGAGGCTTA          |
| IL-6-R                   | RT-PCR  | 5'-GCAAGTGCATCATCGTTGTTTCATAC       |
| IL-10-F                  | RT-PCR  | 5'-CCCTTTGCTATGGTGTCTT              |
| IL-10-R                  | RT-PCR  | 5'-TGGTTTCTCTCCCAAGACC              |
| Arg1-F                   | RT-PCR  | 5'-AGACAGCAGAGGAGGTGAAGAG           |
| Arg1-R                   | RT-PCR  | 5'-CGAAGCAAGCCAAGGTAAAGC            |
| MR-F                     | RT-PCR  | 5'-AAACACAGACTGACCCTTCCC            |
| MR-R                     | RT-PCR  | 5'-GTTAGTGTACCGCACCTCC              |
| Actin-F                  | RT-PCR  | 5'-CATCCGTAAGACCTCTATGCCAAC         |
| Actin-R                  | RT-PCR  | 5'-ATGGAGCCACCGATCCACA              |
| mTOR F                   | RT-PCR  | 5'-ACCGGCACACATTTGAAGAAG            |
| mTOR R                   | RT-PCR  | 5'-CTCGTTGAGGATCAGCAA GG            |
| $\kappa$ B-Ras2 F        | RT-PCR  | 5'-ACCTCAGCGGGAGTGCT                |
| $\kappa$ B-Ras2 R        | RT-PCR  | 5'-GTC CTC CTG GGTCTCGATCA          |
| human- $\kappa$ B-Ras2 F | RT-PCR  | 5'-TGTAGTGGGTTTCGGAGATGAT           |
| human- $\kappa$ B-Ras2 R | RT-PCR  | 5'-CGGTCTGTCTCAATGGAGCC             |
| human-mTOR F             | RT-PCR  | 5'-TCCGAGAGATGAGTCAAGAGG            |
| human-mTOR R             | RT-PCR  | 5'-CACCTTCCACTCCTATGAGGC            |
| mTOR F                   | PCR     | 5'-GCCAATTCCTGAGGCCTGGAAAACCGTCGT   |
| mTOR R                   | PCR     | 5'-GCCTGCAGCGTGGTGTCTAGATGTGGCTTTAC |
| $\kappa$ B-Ras2 F        | PCR     | 5'-GCCATATGGACTAGGTACTGTAAGCATAAC   |
| $\kappa$ B-Ras2 R        | PCR     | 5'-TGCTGCAGGATAAGCTCACTTGATAGCAC    |
| mTOR mut F               | PCR     | 5'-CTG AGA AAA CGC ACA TTT GAC TTA  |
| mTOR mut R               | PCR     | 5'-TAA GTC AAA TGT GCG TTT TCT CAG  |
| Nkiras2 mut F            | PCR     | 5'-CTA GAG CCT TATCAAGCGCTGT        |
| Nkiras2 mut R            | PCR     | 5'-ACA GCG CTT GATAAGGCTCTAG        |
| IRF4 siRNA1              | siRNA   | 5'-CCTCTCATTCTTTAGAATTGTT           |
| IRF4 siRNA2              | siRNA   | 5'-GCTTCACAAGGAAAGCTGTGTG           |
| IRF4 siRNA3              | siRNA   | 5'-GGACACACCUAUGAUGUUATT            |
| mTOR siRNA1              | siRNA   | 5'-CCACCAGAATTGGCAGATT              |
| mTOR siRNA2              | siRNA   | 5'-GCAAAGACCTCATGGGCTT              |
| mTOR siRNA3              | siRNA   | 5'-GCCAATCATTCGCATTCAA              |

---

|                |       |                         |
|----------------|-------|-------------------------|
| κB-Ras2 siRNA1 | siRNA | 5'-CCCTCCTAGAGCCTTTCAT  |
| κB-Ras2 siRNA2 | siRNA | 5'-GGAGCAGGTGCGTTTCTAT  |
| κB-Ras2 siRNA3 | siRNA | 5'- CCGGGAGGTTGAAAGCTAA |

---

\*F, forward; R, reverse.
